# Supplementary material
Source: Springer Nature journal article supplement (https://www.springermedizin.de/resource/supplementary/13054_2012_1673_MOESM4_ESM.pdf/9711178)

**A**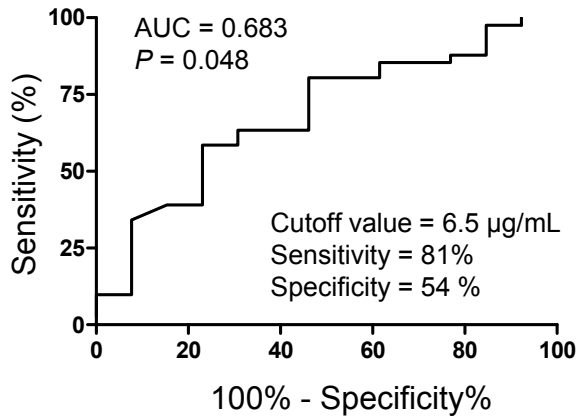**B**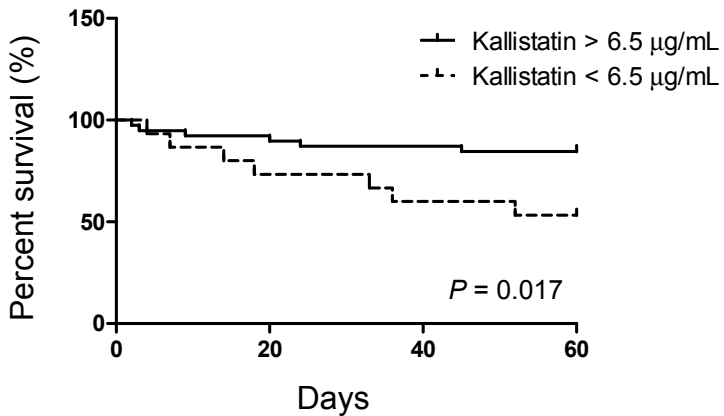

Supplement: MOESM4 [file 9711178]
